# Supplementary material for: Massive metagenomic data analysis using abundance-based machine learning
Source: PubMed Central journal article supplement (PMC6676585; doi:10.1186/s13062-019-0242-0), 2019-08-01

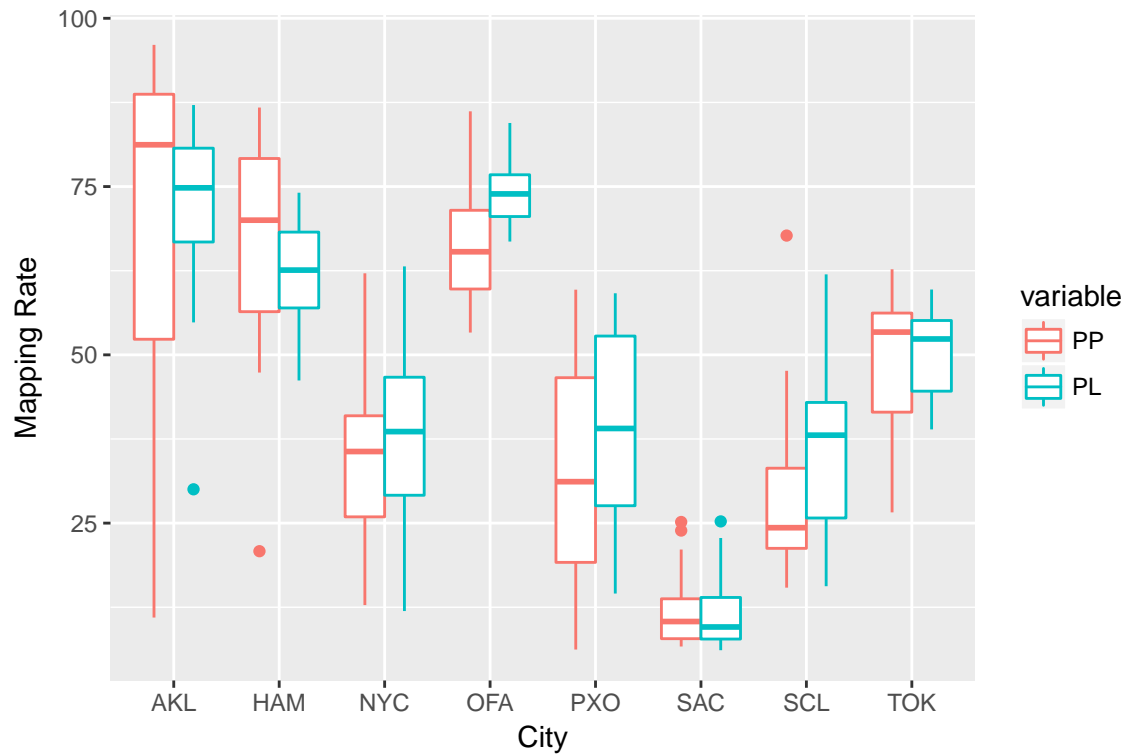

Supplement: 13062_2019_242_MOESM2_ESM.pdf [file 13062_2019_242_MOESM2_ESM.pdf]
